1 **Title:** Expansion of a fly TBI model to four levels of injury severity reveals synergistic effects of  
2 repetitive injury for moderate injury conditions

3 **Authors:** Lauren J Putnam\*, Ashley M Willes\*, Brooke E Kalata\*, Nathaniel D Disher\*, Douglas J  
4 Brusich

5 \* = authors contributed equally to this work

6 **Author Affiliations:** Human Biology, College of Science, Engineering, and Technology, University  
7 of Wisconsin – Green Bay, Green Bay, WI, USA

8 **Corresponding Author:** Dr. Douglas J Brusich, [brusichd@uwgb.edu](mailto:brusichd@uwgb.edu)

9

10 **Running Title:** Expansion of a fly TBI model and synergistic effects

11

## Expansion of a fly TBI model and synergistic effects

### 12 **ABSTRACT**

13 Several million traumatic brain injury (TBI) events are reported in the United States annually.  
14 However, mild TBI events often go unreported, and mild and repetitive mild TBI conditions are  
15 challenging to model. Fruit flies (*Drosophila melanogaster*) have gained traction for the study of  
16 TBI. The best-characterized fly TBI model is the high-impact trauma (HIT) method. We  
17 replicated the HIT method and confirmed several previous findings at the standard level of injury  
18 severity. We then expanded upon the HIT model by characterizing mortality across three  
19 reduced levels of injury severity. Importantly, we found reduced mortality with reduced injury  
20 severity and synergistic effects on mortality in response to repetitive TBI by our moderate injury  
21 conditions. Last, we compared moderate, repetitive TBI to a single severe TBI via assessment  
22 of the pattern of mortality and geotaxis performance in the 24 h following TBI. We found the  
23 number and severity of injuries could result in different patterns of death, while all TBI conditions  
24 led to impaired geotaxis compared to uninjured flies at 0.5 h and 6 h post-TBI. Thus, we have  
25 extended a well-characterized model of TBI in flies, and shown the utility of this model for  
26 making unique insights into TBI across various severities, injury numbers, and time-points post-  
27 injury.

28

29 **Keywords:** traumatic brain injury, TBI, repetitive injury, mortality, geotaxis, *Drosophila*,  
30 injury severity

31 **INTRODUCTION**

32 In the United States, traumatic brain injury (TBI) annually accounts for greater than 2.5 million  
33 emergency room (ER) visits, hospitalizations, and deaths combined (Taylor et al. 2017).  
34 Additionally, half of all mild TBI events are estimated to go unreported (Cassidy et al. 2004).  
35 Mild TBI events, including concussion and sub-concussive impacts, are commonly suffered  
36 during sports participation and military deployment (Marar et al. 2012; Helmick et al. 2015; Kerr  
37 et al. 2017; Baldwin et al. 2018). Individuals in contact sports such as football may experience  
38 greater than one thousand mild head impacts per year, while approximately 10% of U.S. Army  
39 soldiers reported multiple mild TBI events from a previous deployment (Crisco et al. 2010; Wilk  
40 et al. 2012).

41 Severe TBI events are associated with long-term outcomes including greater risk for dementia,  
42 and are associated with many hallmarks of neurodegenerative disease (DeKosky and Asken  
43 2017; Nordström and Nordström 2018). Individual mild TBI events are not well-linked to long-  
44 term outcomes, and most TBI-associated conditions resolve within months, particularly in  
45 children (Holm et al. 2005). By contrast, repetitive mild TBI is associated with more prominent  
46 impairment or disease, such as a greater risk of neurodegenerative disease in American football  
47 players (Lehman et al. 2012; Bailes et al. 2013; Levin and Robertson 2013). Moreover, rodent  
48 models of repetitive mild TBI result in neurocognitive deficits, and histological and morphological  
49 changes associated with neurodegenerative disease (Mouzon et al. 2012; Ojo et al. 2016; Gold  
50 et al. 2018). Importantly, additional TBI events suffered within days of the first injury result in  
51 more negative outcomes due to the combination of primary and secondary injury mechanisms  
52 (Laurer et al. 2001; Longhi et al. 2005; Friess et al. 2009; Meehan et al. 2012; Huang et al.  
53 2013; Bolton and Saatman 2014; Weil et al. 2014; Bolton Hall et al. 2016).

54 Two models for studying TBI have been developed for the fruit fly (*Drosophila melanogaster*):  
55 the high-impact trauma (HIT) method, which uses a spring-based device deflected to 90°, and  
56 the Bead Ruptor homogenizer method, which uses a programmable homogenizer that can be  
57 set to various speeds and durations (Katzenberger et al. 2013; Barekat et al. 2016). Importantly,  
58 use of each method results in classic post-TBI symptoms including impaired locomotion,  
59 shortened lifespan, neurodegeneration, intestinal barrier disruption, and activation of immune  
60 and autophagy processes (Katzenberger et al. 2013; Barekat et al. 2016; Anderson et al. 2018).  
61 While the Bead Ruptor method offers potential advantages in the ease of scaling primary  
62 injuries and inter-experiment standardization, the HIT method is simple, cost-effective, and

## Expansion of a fly TBI model and synergistic effects

63 better characterized to date (Katzenberger et al. 2013, 2015, 2016; Barekat et al. 2016;  
64 Anderson et al. 2018).

65 We sought to standardize the HIT method across several levels of injury severity, thereby  
66 extending this well-characterized method to the study of mild to severe TBI events in an easily  
67 replicable manner. To this end, we installed fixed, selectable stopping points that limited  
68 deflection of the HIT device to either 60°, 70°, 80°, or 90°. We found that reducing the angle of  
69 deflection greatly reduced mortality, and that repetitive injury at moderate levels of severity  
70 resulted in a pronounced synergistic effect on mortality. Moreover, we found that the pattern of  
71 death in the 24 h post-TBI could be affected by the nature of repetitive injury. Last, we found  
72 that locomotion was impaired when assessed at an early 0.5 h time-point and also during the  
73 secondary injury window at 6 h post-TBI, but was no different than controls when assessed 2 h  
74 or 24 h post-TBI.

## Expansion of a fly TBI model and synergistic effects

### 75 **MATERIALS AND METHODS**

#### 76 Fly Husbandry

77 Flies of genotype  $w^{1118}$  (BL 5905) and  $y^1w^1$  (BL 1495) were obtained from the Bloomington  
78 Drosophila Stock Center (Bloomington, Indiana, USA). Flies were maintained in a 25°C  
79 humidified incubator on a 12H:12H light:dark cycle. Flies were maintained on a glucose-  
80 cornmeal-yeast media with the following quantities per 1.25L of water: 7.66g agar (Apex), 14.4g  
81 glucose (DOT Scientific Inc.), 50.3g cornmeal (Genesee), 15g yeast (Genesee), 5.66mL  
82 tegosept (Genesee), 4.67mL propionic acid (99%, Acros Organics), and 0.47mL phosphoric  
83 acid (85%, Matheson Coleman & Bell Inc.).

#### 84 TBI Methodology

85 Flies were collected using light-CO<sub>2</sub> anesthesia. Flies were subjected to traumatic brain injury  
86 on or before 5 days after eclosion (dae) using an adapted model of the high-impact trauma  
87 (HIT) device (Katzenberger et al. 2013). Briefly, flies were transferred to an empty vial and the  
88 vial was affixed to the end of a compression spring. The vial was deflected to a selectable, fixed  
89 stopping point of 60°, 70°, 80° or 90°. The vial was released and allowed to collide with a foam  
90 pad covered by a 1/16" rubber pad. Vial deflections were repeated every 15 seconds for the  
91 total number of deflections indicated. Flies were immediately hand-transferred to a food vial  
92 following the final injury. Uninjured flies were handled identically minus spring deflection and  
93 injury. The number of dead flies were counted at designated time-points ranging from 30  
94 minutes post-injury to 24 h post-injury. Flies counted at 24 h post-injury were used to determine  
95 the mortality index at 24 h (MI<sub>24</sub>) (MI<sub>24</sub> = # flies dead at 24 h post-injury/total # flies \* 100). The  
96 MI<sub>24</sub>/HIT values were determined using the MI<sub>24</sub> divided by total number of injuries for the  
97 condition.

#### 98 Negative Geotaxis

99 Flies aged 0-4 dae were collected under light-CO<sub>2</sub> anesthesia and transferred to food vials.  
100 Animals were subjected to TBI, following the same methods as above, and geotaxis testing, at a  
101 designated time post-TBI, a minimum of 1 day after CO<sub>2</sub> exposure. Individual vials of flies were  
102 tested at a single time-point each and a minimum of 5 vials were used for each time-point. Prior  
103 to geotaxis testing, flies were hand-transferred to empty vials and given 10 minutes undisturbed  
104 on the geotaxis platform to recover prior to experimentation. Vial plugs were kept to within the  
105 top 10mm of the vial.

## Expansion of a fly TBI model and synergistic effects

106 A custom-built geotaxis apparatus which accommodated up to 6 vials simultaneously was used  
107 for all geotaxis testing. Briefly, the device consisted of wood and plywood construction affixed to  
108 two ring stands used as vertical runners. Geotaxis behavior was initiated by startle whereby the  
109 device was lifted to stops on the ring stands which allowed approximately 95mm of vertical  
110 movement, dropped, and the process repeated twice more for a total of 3 drops in quick  
111 succession. Foam pads were used to cushion both the device and the platform upon which the  
112 vials rested. Vials were held in place on the device by use of elastic cords placed around the top  
113 10mm of the vial. A webcam (Logitech c270) was used to record each experiment.

114 VLC media player (version 3.0.6) with a self-written subtitle file displaying the video time to the  
115 tenths of seconds was used for analysis. Screenshots were taken at 5.0 s and 10.0 s after the  
116 3<sup>rd</sup> drop. Screenshots were processed in ImageJ (1.47v/Java 1.6.0\_20 (32-bit)). Three lines  
117 were drawn to measure the height of the vial in pixels and averaged. The Cell Counter plug-in  
118 was used to mark vial bottoms and flies for each sample. Pixel coordinates from Cell Counter  
119 were combined with the pixel measure of the vial and the known length of the vial (95mm) to  
120 convert each fly's pixel coordinate to a distance traveled from the vial bottom in millimeters.  
121 Distance measurements were capped at 50mm. GraphPad Prism 7 software (GraphPad  
122 Software, Inc.) was used to generate a histogram of distance measures and bin values into  
123 12.5mm quartiles. Dead flies were not included in geotaxis measurements.

### 124 Statistics

125 Pairwise comparisons of categorical (dead:alive) count data were performed using a 2x2  
126 Fisher's Exact Test between selected conditions (GraphPad Prism 7). Bonferroni correction was  
127 used to correct for multiple testing and corrected alpha levels are reported in figure legends.  
128 Comparisons of median  $MI_{24}/HIT$  values and geotaxis data were conducted via Kruskal-Wallis  
129 testing (GraphPad Prism 7) with multiple comparisons of mean ranks and Dunn's correction at a  
130 level of  $\alpha = 0.05$ . Only vials containing at least 30 flies were used in median  $MI_{24}/HIT$   
131 comparisons. Full count data were used for comparisons of trends across  $MI_{24}/HIT$  data; overall  
132  $MI_{24}$  values were divided by their respective HIT number, plotted across 1-4HITs, and fitted  
133 using the linear fit mode within the nonlinear regression analysis toolkit (GraphPad Prism 7).  
134 Lines were fitted using the least squares fit mode, compared to a hypothetical slope of zero via  
135 the extra sum-of-squares F test at a level of  $\alpha = 0.05$ , and the 95% confidence interval (CI)  
136 determined asymmetrically. Dead fly counts from determination of death across time-points  
137 were compared by Fisher's Exact Tests of 4x2 matrices in R (version 3.5.1) with post-hoc,  
138 pairwise comparisons (dead within window:dead outside of window) via 2x2 Fisher's Exact

## Expansion of a fly TBI model and synergistic effects

139 Tests (GraphPad Prism 7). Bonferroni correction was used to correct for multiple post-hoc  
140 testing and the corrected alpha level is reported in the text or figure legend.

## Expansion of a fly TBI model and synergistic effects

### 141 **RESULTS**

#### 142 Replication of 90° HIT data

143 The primary measure of TBI outcomes in flies is the percentage of flies that die within 24 hours  
144 post-injury ( $MI_{24}$ ). We first set out to determine how our TBI system and resulting  $MI_{24}$  values  
145 compared to existing models. We conducted experiments using a 90° angle of deflection and  
146 two strains of fruit fly,  $w^{1118}$  and  $y^1w^1$ , for which  $y^1w^1$  was previously reported to suffer higher  
147  $MI_{24}$  (Katzenberger et al. 2013). Vials of flies were subjected to 0-4 high-impact traumatic  
148 injuries (HITs) (see Table 1 for all categorical count data). Uninjured flies suffered little or no  
149 mortality at 24 h, while administration of 1-4HITs resulted in pronounced  $MI_{24}$  with increased  
150 death upon increased HIT number (Fig. 1A, shared letters indicate statistical significance  
151 between conditions). Comparisons across genotypes showed  $MI_{24}$  values of  $w^{1118}$  and  $y^1w^1$  flies  
152 were no different for uninjured controls, but  $y^1w^1$  flies suffered greater mortality than  $w^{1118}$  flies  
153 for each of the 1-4HIT datasets (Fig. 1A, (\*) indicates differences between genotypes).

154 It was previously reported that  $MI_{24}$  values divided by HIT number ( $MI_{24}/HIT$ ) were no different  
155 from one another when compared across a range of HITs (Katzenberger et al. 2013). We  
156 carried out the same comparisons for our datasets and found differences for median  $MI_{24}/HIT$   
157 values for  $w^{1118}$  (Fig. 1B, 1HIT vs 3HIT) and  $y^1w^1$  (Fig. 1C, 1HIT vs 3HITs, and 1HIT vs 4HITs).  
158 The differences in  $MI_{24}/HIT$  prompted us to look more closely at the pattern of change in  
159 mortality across HIT numbers. If mortality is directly proportional to the number of flies which  
160 experience a critical injury for each HIT then we would expect the  $MI_{24}/HIT$  values compared  
161 across HIT numbers to have a zero slope. We used overall count data to determine  $MI_{24}/HIT$   
162 values and then fitted these points across 1-4 HITs with a linear best-fit model. At 90° we found  
163 that neither  $w^{1118}$  nor  $y^1w^1$  had slopes that significantly deviated from zero (Table 2).

#### 164 Expansion to three levels of reduced injury severity

165 In order to expand the range of primary injury severities by the HIT method, we added  
166 additional, fixed, selectable stopping points to reduce the angle of deflection to 80°, 70°, or 60°.  
167 We again assessed  $MI_{24}$  outcomes by independently administering 1-4HITs at each of the three  
168 new angles of deflection. We found lower  $MI_{24}$  values in each of the new deflection angles when  
169 compared to 90° within both  $w^{1118}$  and  $y^1w^1$  datasets at each of 1-4HITs (Fig. 2A-D respectively).  
170 We also found significantly reduced  $MI_{24}$  with each reduction in deflection angle from 80° to 70°  
171 and then 70° to 60° at each of 2-4 HITs within both  $w^{1118}$  and  $y^1w^1$  datasets (Figs. 2B-D), while  
172 genotype-specific differences across deflection angle were seen at 1HIT (Fig. 2A). Moreover, in



## Expansion of a fly TBI model and synergistic effects

173 both genotypes we found the  $MI_{24}$  from 1HIT at  $60^\circ$ , our most mild injury severity, was not  
174 significantly different than the  $MI_{24}$  in uninjured animals using a significance level of  $\alpha = 0.005$   
175 after Bonferroni correction (Fig. 2A, p-values:  $w^{1118} = 0.39$ ,  $y^1w^1 = 0.03$ ). Last, we found  $y^1w^1$   
176 flies suffered greater mortality than  $w^{1118}$  flies at all deflection angles when 3 or 4 HITs were  
177 administered (Figs. 2C and 2D). However, differences between genotypes were only statistically  
178 different at the  $80^\circ$  and  $90^\circ$  deflection angles when injuries were limited to 1 or 2 HITs (Figs. 2A  
179 and 2B). Nonetheless,  $y^1w^1$  flies appeared comparatively more sensitive to TBI at less severe  
180 primary injuries as the fold-difference in  $y^1w^1:w^{1118}$   $MI_{24}$  values progressively decreased from  
181 3.84-fold at  $60^\circ$  to 1.53-fold at  $90^\circ$  for 4HITs (Fig. 2D), a pattern similarly observed for other HIT  
182 numbers.

### 183 Synergistic effects are apparent for repetitive injury at moderate TBI severity

184 We continued our analysis of the additional deflection angles to comparisons of  $MI_{24}/HIT$  values.  
185 We found differences in  $MI_{24}/HIT$  values when comparing 1HIT and 4HITs in both  $w^{1118}$  and  $y^1w^1$   
186 at each of the sub- $90^\circ$  deflection angles (Fig. 3). Additionally, differences between both 1HIT  
187 and 3HITs, and 2HITs and 4HITs were also seen for  $w^{1118}$  at  $80^\circ$  (Fig. 3A) and  $y^1w^1$  at  $70^\circ$  (Fig.  
188 3D). We again investigated trends in  $MI_{24}/HIT$  data from 1-4HITs via analysis of slopes from  
189 best-fit lines. If mortality was strictly additive for each HIT then the trend across  $MI_{24}/HIT$  data  
190 should generate a zero-slope line. However, at both  $80^\circ$  and  $70^\circ$ , but not  $60^\circ$ , both  $w^{1118}$  and  
191  $y^1w^1$  had positive, significantly non-zero slopes, indicating a synergistic effect on mortality  
192 (Table 2). The positive slopes and synergistic effects were most evident at moderate severity  
193 injuries of  $80^\circ$  for  $w^{1118}$  ( $1.82 \pm 0.05$  (SE)) and  $70^\circ$  for  $y^1w^1$  ( $2.08 \pm 0.42$  (SE)) (Table 2).

### 194 Time-Course of Mortality

195 Animals subjected to TBI experience both primary injury from the TBI event itself and secondary  
196 injuries related to cellular and molecular events instigated by the primary injury. The secondary  
197 injury period in flies reportedly peaks between 1 h and 8 h post-injury and persists for at least 24  
198 h (Katzenberger et al. 2016). We hypothesized that the relative contributions of primary and  
199 secondary injuries on mortality would differ when comparing a single severe injury ( $90^\circ \times 1HIT$ )  
200 to repetitive injury at less severe angles. By our data, injury via  $90^\circ \times 1HIT$  results in similar  $MI_{24}$   
201 values as  $80^\circ \times 2HITs$  and  $70^\circ \times 3HITs$ , particularly for  $y^1w^1$  flies (Table 1), thereby giving us  
202 conditions by which to test our hypothesis while keeping overall  $MI_{24}$  values comparable. We  
203 injured new cohorts of flies by these 3 conditions and recorded mortality post-TBI at times which  
204 corresponded to an early, pre-secondary injury window (0.5 h), early peak of the secondary

## Expansion of a fly TBI model and synergistic effects

205 injury period (2 h), delayed peak of the secondary injury period (8 h), and late secondary injury  
206 period (24 h).

207 We found the only conditions which generated different patterns in the time-course of death  
208 were 80° x 2HITs vs 90° x 1HIT, and this was true for both the  $w^{1118}$  and  $y^1w^1$  genotypes (Fig. 4).  
209 Notably, while the overall trends between the two conditions differed for  $w^{1118}$  there were no  
210 pairwise differences by post-hoc testing (Fig. 4). By contrast,  $y^1w^1$  flies showed significantly  
211 greater late death from 8 h – 24 h when injured by 80° x 2HITs vs. 90° x 1HIT (Fig. 4). Injury via  
212 70° x 3HITs resulted in no differences in the time-course of death compared to either the 80° x  
213 2HITs or 90° x 1HIT conditions for either genotype (Fig. 4).

214 Last, we compared the pattern of death between the  $w^{1118}$  and  $y^1w^1$  genotypes. We found the  
215 pattern of death from both the 70° x 3HITs and 80° x 2HITs differed between genotypes (Figs.  
216 4A and 4B; 70°:  $p = 0.010$ , 80°:  $p = 0.002$ ,  $\alpha = 0.017$  by 4x2 Fisher's Exact Test with Bonferroni  
217 correction). By pairwise comparisons of the 70° x 3HIT datasets, we found that  $w^{1118}$  flies  
218 suffered a greater proportion of death by 0.5 h post-TBI than  $y^1w^1$  flies ( $p = 0.001$ ,  $\alpha = 0.0125$  by  
219 2x2 Fisher's Exact Test with Bonferroni correction). Alternately,  $y^1w^1$  flies suffered greater death  
220 during the 2+ h to 8 h period than  $w^{1118}$  flies by comparison of 80° x 2HITs datasets ( $p = 0.004$ ,  
221  $\alpha = 0.0125$  by 2x2 Fisher's Exact Test with Bonferroni correction).

### 222 Time-Course of Motor Dysfunction

223 Flies are well-known to exhibit motor dysfunction following TBI (Katzenberger et al. 2013;  
224 Barekat et al. 2016; Anderson et al. 2018). However, the time-course of motor dysfunction  
225 across the primary and secondary injury periods, and for TBI of varying severities is not well-  
226 characterized. Therefore, we extended our characterization of outcomes across several time-  
227 points and the 70° x 3HITs, 80° x 2HITs, and 90° x 1HIT conditions via a negative geotaxis  
228 assay. We restricted our analysis to  $w^{1118}$  flies which have been best-characterized via this  
229 assay to date. We also opted to use a 6 h post-TBI time-point in place of the 8 h time-point used  
230 for the time-course of mortality to better capture outcomes during the middle of the peak of the  
231 secondary injury window.

232 We determined geotaxis performance by measuring the distance traveled by each fly 5 seconds  
233 and 10 seconds after startle, which were similar time-points to previous literature (Gargano et al.  
234 2005; Linderman et al. 2012; Podratz et al. 2013; Anderson et al. 2018). All conditions showed  
235 improved scores at 10 s compared to 5 s (Fig. 5,  $p < 0.05$ ,  $\alpha = 0.5$ , Kruskal-Wallis with Dunn's  
236 correction). In comparing conditions, we found that  $w^{1118}$  flies subjected to any of the three TBI

## Expansion of a fly TBI model and synergistic effects

237 conditions showed impaired geotaxis compared to uninjured flies at both the 0.5 h and 6 h post-  
238 TBI time-points, but not 2 h or 24 h post-TBI time-points, for each of the 5 s and 10 s measures  
239 (Fig. 5, see (\*)). However, we observed no differences in geotaxis performance between any of  
240 the TBI conditions at any of the time-points tested. Comparisons within TBI conditions and  
241 across time-points showed a general trend for improved geotaxis scores at 2 h compared to 0.5  
242 h post-TBI (Fig. 5A: see 'a' and 'b', Fig. 5B: see 'a', 'b', and 'd'), followed by a second  
243 impairment in geotaxis for both the 70° x 3HITs and 80° x 2HITs datasets at 6 h post-TBI when  
244 assessed at 5 s post-startle (Fig. 5A, see 'c' and 'd').

## 245 **DISCUSSION**

246 Fruit flies offer an accessible model to study TBI. Two models of conducting TBI studies in fruit  
247 flies are the high-impact trauma (HIT) method and the Bead Ruptor method (Katzenberger et al.  
248 2013; Barekat et al. 2016). One advantage to the Bead Ruptor method is the ease of scaling the  
249 primary injuries (Barekat et al. 2016). We addressed this gap in methodology and expanded  
250 upon the original HIT method by adding selectable stopping points to reproducibly perform injury  
251 at four levels of injury severity. We then applied our expanded methodology to characterization  
252 of the time-course of death and locomotor dysfunction in the 24 h following TBI.

253 Several of our main findings are in agreement with the established TBI models. First, we found  
254 that increasing the injury number results in dose-dependent increases in mortality (Figs. 1 and  
255 3) (Katzenberger et al. 2013; Barekat et al. 2016; Anderson et al. 2018). Second, we found that  
256  $y^1w^1$  flies suffer greater mortality than  $w^{1118}$  flies subjected to the same injuries, and we  
257 extended this finding to our mild and moderate TBI conditions (Figs. 1 and 2) (Katzenberger et  
258 al. 2013). Notably, our  $MI_{24}$  values at the standard protocol of 90° x 4HITs (Table 1,  $w^{1118}$ :  
259 53.3%;  $y^1w^1$ : 81.6%) were not identical to previous literature ( $w^{1118}$ : ~30%;  $y^1w^1$ : ~50%)  
260 (Katzenberger et al. 2013; Anderson et al. 2018), likely due to lab specific differences such as  
261 variation in the force generated by the spring and/or the features of the collision surface.  
262 However, it is notable that we reproduced the data showing increased sensitivity of  $y^1w^1$  flies  
263 (Katzenberger et al. 2013), thereby demonstrating the reliability of this TBI model and the  
264 penetrance of unknown genetic influences (Katzenberger et al. 2015). Third, we found that  
265 reducing the angle of deflection resulted in less severe primary injuries as indicated by  
266 decreased mortality, and extended this finding across the four levels of deflection tested (Fig. 2)  
267 (Anderson et al. 2018). Fourth, we found that TBI led to diminished locomotor ability that  
268 returned to normal levels by 24 h post-TBI (Fig. 5) (Katzenberger et al. 2013).

## Expansion of a fly TBI model and synergistic effects

269 Several of our findings are also novel for this TBI system. First, we found a synergistic effect of  
270 additional HITs on mortality by our moderate TBI conditions and short inter-injury intervals (15  
271 seconds) (Table 2). It was previously reported that dividing the  $MI_{24}$  by the number of HITs  
272 resulted in no differences when comparing across HIT number (Katzenberger et al. 2013). This  
273 result was used as evidence that the main factor influencing  $MI_{24}$  across multiple HITs was the  
274 likelihood of suffering a critical injury for each HIT, and that secondary injury mechanisms were  
275 negligible for injuries spaced closely together as the secondary injury window does not peak  
276 until 1-8 h after injury (Katzenberger et al. 2013, 2016). By contrast, we found differences when  
277 comparing median  $MI_{24}/HIT$  values even at these close (15 second) inter-injury intervals (Figs.  
278 1B, 1C, 3A-F). Additionally, we looked more closely at the pattern of  $MI_{24}/HIT$  values across HIT  
279 number. If only primary injuries, and not secondary injuries or increased susceptibility to  
280 mortality due to preceding strikes, were responsible for observed  $MI_{24}$  values then the  $MI_{24}/HIT$   
281 values across HIT number should generate a zero slope line. At  $90^\circ$  neither  $w^{1118}$  nor  $y^1w^1$  had  
282 significantly non-zero best-fit line slopes, consistent with properties of the primary injury being  
283 most responsible for  $MI_{24}$  at these severe injury levels and short inter-injury interval (Table 2).  
284 By contrast, for our moderate severity injuries at  $80^\circ$  and  $70^\circ$ , both  $w^{1118}$  and  $y^1w^1$   $MI_{24}/HIT$  data  
285 generated positive, significantly non-zero slopes, indicating a synergistic effect of HIT number  
286 on mortality. This result suggests that secondary injury mechanisms, or increased susceptibility  
287 to injury due to preceding injuries, contributed to  $MI_{24}$  (Table 2). A non-zero trend in  $MI_{24}/HIT$   
288 data was not observed for injuries at  $60^\circ$ , though it is possible that such a trend would be  
289 evident if injury number was further increased as the  $MI_{24}$  value increased noticeably between 3  
290 and 4 HITs for both  $w^{1118}$  and  $y^1w^1$  (Table 2).

291 A second novel finding was the pattern of death in the 24 h following TBI. First, we found a  
292 difference in the pattern of death when comparing  $80^\circ \times 2HITs$  to  $90^\circ \times 1HIT$  within both  $w^{1118}$   
293 and  $y^1w^1$  genotypes (Fig. 4). Interestingly, we observed an increased proportion of death in the  
294 late period from 8+ h to 24 h post-TBI in the  $80^\circ \times 2HIT$  dataset for  $y^1w^1$  flies (Fig. 4A), and a  
295 similar, nonsignificant trend for  $w^{1118}$  flies (Fig. 4B). This finding is consistent with our initial  
296 hypothesis that repetitive, moderate injury would lead to a greater proportion of death in the  
297 secondary injury period than a single, severe TBI event. However, by contrast to this finding, we  
298 found no differences when comparing the pattern of death via  $70^\circ \times 3HITs$  to  $90^\circ \times 1HIT$  (Fig. 4).  
299 Why might 2HITs at the  $80^\circ$  deflection angle, but not 3HITs at  $70^\circ$ , cause a different pattern of  
300 death than 1HIT at  $90^\circ$ ? One possibility is the presence of separate secondary injury  
301 mechanisms, one operating on a short time-scale (seconds) and the other the previously

## Expansion of a fly TBI model and synergistic effects

302 defined mechanism operating on a longer time-scale (hours) (Katzenberger et al. 2016). By this  
303 model, the administration of 2HITs at 80° causes significant secondary injuries on the longer  
304 time-scale and greater death after 8+ h compared to 1HIT at 90° (Fig. 4B). By contrast, 70° x  
305 3HITs and the synergistic secondary effects on the short time-scale exceeds a critical threshold  
306 and causes early death before the classic secondary injury period. Such a two-stage secondary  
307 injury model may also be applicable to differences between genotypes. By our data, the most  
308 common period of death for  $w^{1118}$  flies regardless of TBI condition was within 0.5 h of injury,  
309 while for  $y^1w^1$  flies it was during the typical secondary injury period from 2+ h to 8 h for 70° x  
310 3HITs and 90° x 1HIT datasets and 8+ h to 24 h for the 80° x 2HITs dataset. This data suggests  
311 that  $w^{1118}$  flies are more susceptible to fast secondary injury mechanisms (seconds), while  $y^1w^1$   
312 flies are more susceptible to the later secondary injury mechanisms (hours). Consistent with  
313 this, administration of 70° x 3HITs to each genotype revealed a significant increase in the  
314 proportion of death by the 0.5 h time-period for  $w^{1118}$  as compared to the proportion for  $y^1w^1$  flies  
315 (Fig. 4), consistent with a threshold sensitive to fast secondary injury mechanisms in the  
316 genotype more sensitive to these changes. By contrast, the 80° x 2HIT condition which may not  
317 exceed the early threshold, caused an increase in death during the later, classic secondary  
318 injury period from 2+ h to 8 h in  $y^1w^1$  flies more susceptible to these mechanisms.

319 Our final novel finding was the more detailed pattern of locomotor dysfunction in the 24 h  
320 following TBI and for isolated vs repetitive TBI conditions. We found that flies showed early  
321 locomotor dysfunction at 0.5 h compared to uninjured flies for all three TBI conditions tested, but  
322 found no differences between TBI conditions at this early time-point (Fig. 5). We then saw a  
323 trend for improved geotaxis scores that were no different than controls by the early stages of the  
324 classic secondary injury period at 2 h post-TBI and during the delayed secondary injury period  
325 24 h post-TBI, consistent with previous results for 1-2HITs at 90° (Katzenberger et al. 2013)  
326 (Fig. 5). More interesting and novel were the impaired geotaxis scores for injured flies at 6 h  
327 post-TBI, a time corresponding to the middle of the secondary injury period. However,  
328 diminished geotaxis scores at 6 h post-TBI were only different than 2 h scores for the repetitive  
329 TBI conditions of 70° x 3HITs and 80° x 2HITs (Fig. 5A). Thus, all TBI conditions led to early  
330 geotaxis impairment and a second impairment during the secondary injury window at 6 h post-  
331 TBI, while the secondary period difference at 6 h post-TBI was most noted in the repetitive TBI  
332 conditions.

333 What are the mechanisms by which closely spaced, mild or moderate injuries synergistically  
334 affect TBI outcomes? Secondary mechanisms might include autophagy-related pathways and

## Expansion of a fly TBI model and synergistic effects

335 stress granule formation (Anderson et al. 2018). In fly larvae, stress granules were not apparent  
336 after single TBI events at 60°, minimally increased after 4HITs, and substantially increased after  
337 8HITs in an apparently synergistic fashion (Anderson et al. 2018). Alternatively, glutamate  
338 release and elevated extracellular potassium are observed immediately or within minutes of TBI  
339 (Faden et al. 1989; Katayama et al. 1990). Moreover, extracellular potassium scaled with injury  
340 severity until plateauing for severe injuries, and changes in extracellular potassium were  
341 blocked by addition of tetrodotoxin for moderate but not severe injuries (Katayama et al. 1990).  
342 Thus, dysregulation of neuronal excitability and extracellular potassium operate on short time-  
343 scales and are responsive to injury severity, which are compatible with our observed synergistic  
344 effects for injuries at short inter-injury intervals and for moderate, but not severe TBI.  
345 Downstream consequences of misregulated neurotransmission and extracellular potassium are  
346 varied, but may include changes in oxidative stress and inflammation (Guerriero et al. 2015;  
347 Fehily and Fitzgerald 2017; Khatri et al. 2018).

348 Our evidence for synergistic effects of mild to moderate TBI and short inter-injury intervals is of  
349 consequence to mammals. In mammals the secondary injury window is typically reported as  
350 within days post-injury (Laurer et al. 2001; Longhi et al. 2005; Friess et al. 2009; Meehan et al.  
351 2012; Huang et al. 2013; Bolton and Saatman 2014; Weil et al. 2014; Bolton Hall et al. 2016).  
352 However, the number of sub-concussive events suffered by individuals across a short time-  
353 scale, a single American football game, correlated with short-term blood-brain-barrier damage  
354 (Marchi et al. 2013). Thus, mild TBI events suffered in number across a short time-scale may be  
355 an important factor to consider for brain health, especially considering the large number  
356 (> 1,000) of sub-concussive injuries suffered during football participation across a season of  
357 play (Crisco et al. 2010).

358 The exact secondary mechanisms underlying the fast synergistic effects we observed are thus  
359 far unknown. Moreover, we do not know if synergistic effects at mild to moderate TBI conditions  
360 in our model drive other TBI-related consequences observed in flies such as changes in lifespan  
361 and inflammation (Katzenberger et al. 2013, 2015, 2016; Barekat et al. 2016; Anderson et al.  
362 2018). However, our fly model offers an unparalleled platform for rapidly, and systematically,  
363 testing candidate factors or pathways for their involvement in TBI outcomes across injury  
364 severities, number, and inter-injury interval. Recognition and elucidation of cellular and  
365 molecular differences in response to mild vs moderate, single vs multiple TBI events, and  
366 across varying time-scales will be important in determining optimal disease-intervention  
367 strategies. Our extended model will be central to these efforts going forward.



## Expansion of a fly TBI model and synergistic effects

368 **Acknowledgements:** The authors thank members of the Human Biology Department at the  
369 University of Wisconsin – Green Bay for careful reading of the manuscript and suggested  
370 revisions. We also thank Dr. C. Andrew Frank, Dr. Tina Tootle, Dr. Atulya Iyengar, and Dr.  
371 Javier Gomez for reading the manuscript and offering revisions, and for their support in  
372 answering many questions about lab set-up and publication. We also thank Mark Damie and  
373 Joe Schoenebeck of the University of Wisconsin – Green Bay for assistance in lab set-up.

374 **Declarations of Interests:** The authors have no conflicts of interest.

375 **Funding:** This work was supported by University of Wisconsin – Green Bay Start-Up Funds,  
376 University of Wisconsin – Green Bay Summer Scholar Grant, and Medical College of Wisconsin  
377 Professional Development Funds.

378 **LITERATURE CITED**

- 379 **Anderson EN, Gochenaur L, Singh A, Grant R, Patel K, Watkins S, Wu JY, Pandey UB.**  
380 Traumatic injury induces stress granule formation and enhances motor dysfunctions in ALS/FTD  
381 models. *Human Molecular Genetics* 27: 1366–1381, 2018.
- 382 **Bailes JE, Petraglia AL, Omalu BI, Nauman E, Talavage T.** Role of subconcussion in  
383 repetitive mild traumatic brain injury. *Journal of Neurosurgery* 119: 1235–1245, 2013.
- 384 **Baldwin GT, Breiding MJ, Dawn Comstock R.** Epidemiology of sports concussion in the  
385 United States. In: *Handbook of clinical neurology*. 2018, p. 63–74.
- 386 **Barekat A, Gonzalez A, Mauntz RE, Kotzebue RW, Molina B, El-Mecharrarie N, Conner CJ,**  
387 **Garza S, Melkani GC, Joiner WJ, Lipinski MM, Finley KD, Ratliff EP.** Using *Drosophila* as an  
388 integrated model to study mild repetitive traumatic brain injury. *Scientific Reports* 6: 25252,  
389 2016.
- 390 **Bolton AN, Saatman KE.** Regional Neurodegeneration and Gliosis Are Amplified by Mild  
391 Traumatic Brain Injury Repeated at 24-Hour Intervals. *Journal of neuropathology and*  
392 *experimental neurology* 73: 933, 2014.
- 393 **Bolton Hall AN, Joseph B, Brelsfoard JM, Saatman KE.** Repeated Closed Head Injury in  
394 Mice Results in Sustained Motor and Memory Deficits and Chronic Cellular Changes. *PLOS*  
395 *ONE* 11: e0159442, 2016.
- 396 **Cassidy JD, Carroll LJ, Peloso PM, Borg J, von Holst H, Holm L, Kraus J, Coronado VG,**  
397 **WHO Collaborating Centre Task Force on Mild Traumatic Brain Injury.** Incidence, risk  
398 factors and prevention of mild traumatic brain injury: results of the WHO Collaborating Centre  
399 Task Force on Mild Traumatic Brain Injury. *Journal of rehabilitation medicine* : 28–60, 2004.
- 400 **Crisco JJ, Fiore R, Beckwith JG, Chu JJ, Broinson PG, Duma S, McAllister TW, Duhaime**  
401 **A-C, Greenwald RM.** Frequency and Location of Head Impact Exposures in Individual  
402 Collegiate Football Players. *Journal of Athletic Training* 45: 549–559, 2010.
- 403 **DeKosky ST, Asken BM.** Injury cascades in TBI-related neurodegeneration. *Brain Injury* 31:  
404 1177–1182, 2017.
- 405 **Faden AI, Demediuk P, Panter SS, Vink R.** The role of excitatory amino acids and NMDA  
406 receptors in traumatic brain injury. *Science (New York, NY)* 244: 798–800, 1989.
- 407 **Fehily B, Fitzgerald M.** Repeated Mild Traumatic Brain Injury. *Cell Transplantation* 26: 1131–  
408 1155, 2017.
- 409 **Friess SH, Ichord RN, Ralston J, Ryall K, Helfaer MA, Smith C, Margulies SS.** Repeated  
410 traumatic brain injury affects composite cognitive function in piglets. *Journal of neurotrauma* 26:  
411 1111–21, 2009.
- 412 **Gargano J, Martin I, Bhandari P, Grotewiel M.** Rapid iterative negative geotaxis (RING): a  
413 new method for assessing age-related locomotor decline in. *Experimental Gerontology* 40: 386–  
414 395, 2005.
- 415 **Gold EM, Vasilevko V, Hasselmann J, Tiefenthaler C, Hoa D, Ranawaka K, Cribbs DH,**  
416 **Cummings BJ.** Repeated Mild Closed Head Injuries Induce Long-Term White Matter Pathology  
417 and Neuronal Loss That Are Correlated With Behavioral Deficits. *ASN Neuro* 10:  
418 175909141878192, 2018.



Expansion of a fly TBI model and synergistic effects

- 419 **Guerriero RM, Giza CC, Rotenberg A.** Glutamate and GABA imbalance following traumatic  
420 brain injury. *Current neurology and neuroscience reports* 15: 27, 2015.
- 421 **Helmick KM, Spells CA, Malik SZ, Davies CA, Marion DW, Hinds SR.** Traumatic brain injury  
422 in the US military: epidemiology and key clinical and research programs. *Brain Imaging and*  
423 *Behavior* 9: 358–366, 2015.
- 424 **Holm L, David Cassidy J, Carroll L, Borg J, Neurotrauma Task Force on Mild Traumatic**  
425 **Brain Injury of the WHO Collaborating Centre.** Summary of the WHO collaborating centre for  
426 neurotrauma task force on mild traumatic brain injury. *Journal of Rehabilitation Medicine* 37:  
427 137–141, 2005.
- 428 **Huang L, Coats JS, Mohd-Yusof A, Yin Y, Assaad S, Muellner MJ, Kamper JE, Hartman**  
429 **RE, Dulcich M, Donovan VM, Oyoyo U, Obenaus A.** Tissue vulnerability is increased  
430 following repetitive mild traumatic brain injury in the rat. *Brain Research* 1499: 109–120, 2013.
- 431 **Katayama Y, Becker DP, Tamura T, Hovda DA.** Massive increases in extracellular potassium  
432 and the indiscriminate release of glutamate following concussive brain injury. *Journal of*  
433 *Neurosurgery* 73: 889–900, 1990.
- 434 **Katzenberger RJ, Chtarbanova S, Rimkus SA, Fischer JA, Kaur G, Seppala JM, Swanson**  
435 **LC, Zajac JE, Ganetzky B, Wassarman DA.** Death following traumatic brain injury in  
436 *Drosophila* is associated with intestinal barrier dysfunction. *eLife* 4, 2015.
- 437 **Katzenberger RJ, Ganetzky B, Wassarman DA.** Age and Diet Affect Genetically Separable  
438 Secondary Injuries that Cause Acute Mortality Following Traumatic Brain Injury in *Drosophila*.  
439 *G3 (Bethesda, Md)* 6: 4151–4166, 2016.
- 440 **Katzenberger RJ, Loewen CA, Wassarman DR, Petersen AJ, Ganetzky B, Wassarman DA.**  
441 A *Drosophila* model of closed head traumatic brain injury. *Proceedings of the National Academy*  
442 *of Sciences of the United States of America* 110: E4152-9, 2013.
- 443 **Kerr ZY, Roos KG, Djoko A, Dalton SL, Broglio SP, Marshall SW, Dompier TP.**  
444 Epidemiologic Measures for Quantifying the Incidence of Concussion in National Collegiate  
445 Athletic Association Sports. *Journal of Athletic Training* 52: 167, 2017.
- 446 **Khatri N, Thakur M, Pareek V, Kumar S, Sharma S, Datusalia AK.** Oxidative Stress: Major  
447 Threat in Traumatic Brain Injury. *CNS & neurological disorders drug targets* 17: 689–695, 2018.
- 448 **Laurer HL, Bareyre FM, Lee VMYC, Trojanowski JQ, Longhi L, Hoover R, Saatman KE,**  
449 **Raghupathi R, Hoshino S, Grady MS, McIntosh TK.** Mild head injury increasing the brain's  
450 vulnerability to a second concussive impact. *Journal of Neurosurgery* 95: 859–870, 2001.
- 451 **Lehman EJ, Hein MJ, Baron SL, Gersic CM.** Neurodegenerative causes of death among  
452 retired National Football League players. *Neurology* 79: 1970–1974, 2012.
- 453 **Levin HS, Robertson CS.** Mild traumatic brain injury in translation. *Journal of neurotrauma* 30:  
454 610–7, 2013.
- 455 **Linderman JA, Chambers MC, Gupta AS, Schneider DS.** Infection-Related Declines in Chill  
456 Coma Recovery and Negative Geotaxis in *Drosophila melanogaster*. *PLoS ONE* 7: 41907,  
457 2012.
- 458 **Longhi L, Saatman KE, Fujimoto S, Raghupathi R, Meaney DF, Davis J, McMillan B S A,**  
459 **Conte V, Laurer HL, Stein S, Stocchetti N, McIntosh TK.** Temporal window of vulnerability to  
460 repetitive experimental concussive brain injury. *Neurosurgery* 56: 364–74, 2005.

Expansion of a fly TBI model and synergistic effects

- 461 **Marar M, McIlvain NM, Fields SK, Comstock RD.** Epidemiology of Concussions Among  
462 United States High School Athletes in 20 Sports. *The American Journal of Sports Medicine* 40:  
463 747–755, 2012.
- 464 **Marchi N, Bazarian JJ, Puvenna V, Janigro M, Ghosh C, Zhong J, Zhu T, Blackman E,**  
465 **Stewart D, Ellis J, Butler R, Janigro D.** Consequences of Repeated Blood-Brain Barrier  
466 Disruption in Football Players. *PLoS ONE* 8: e56805, 2013.
- 467 **Meehan WP, Zhang J, Mannix R, Whalen MJ.** Increasing Recovery Time Between Injuries  
468 Improves Cognitive Outcome After Repetitive Mild Concussive Brain Injuries in Mice.  
469 *Neurosurgery* 71: 885–892, 2012.
- 470 **Mouzon B, Chaytow H, Crynen G, Bachmeier C, Stewart J, Mullan M, Stewart W, Crawford**  
471 **F.** Repetitive Mild Traumatic Brain Injury in a Mouse Model Produces Learning and Memory  
472 Deficits Accompanied by Histological Changes. *Journal of Neurotrauma* 29: 2761–2773, 2012.
- 473 **Nordström A, Nordström P.** Traumatic brain injury and the risk of dementia diagnosis: A  
474 nationwide cohort study. *PLoS medicine* 15: e1002496, 2018.
- 475 **Ojo JO, Mouzon B, Algamal M, Leary P, Lynch C, Abdullah L, Evans J, Mullan M,**  
476 **Bachmeier C, Stewart W, Crawford F.** Chronic Repetitive Mild Traumatic Brain Injury Results  
477 in Reduced Cerebral Blood Flow, Axonal Injury, Gliosis, and Increased T-Tau and Tau  
478 Oligomers. *Journal of Neuropathology and Experimental Neurology* 75: 636, 2016.
- 479 **Podratz JL, Staff NP, Boesche JB, Giorno NJ, Hainy ME, Herring SA, Klennert MT,**  
480 **Milaster C, Nowakowski SE, Krug RG, Peng Y, Windebank AJ, Windebank AJ.** An  
481 automated climbing apparatus to measure chemotherapy-induced neurotoxicity in *Drosophila*  
482 *melanogaster*. *Fly* 7: 187–92, 2013.
- 483 **Taylor CA, Bell JM, Breiding MJ, Xu L.** Traumatic Brain Injury–Related Emergency  
484 Department Visits, Hospitalizations, and Deaths — United States, 2007 and 2013. *MMWR*  
485 *Surveillance Summaries* 66: 1–16, 2017.
- 486 **Weil ZM, Gaier KR, Karelina K.** Injury timing alters metabolic, inflammatory and functional  
487 outcomes following repeated mild traumatic brain injury. *Neurobiology of Disease* 70: 108–116,  
488 2014.
- 489 **Wilk JE, Herrell RK, Wynn GH, Riviere LA, Hoge CW.** Mild Traumatic Brain Injury  
490 (Concussion), Posttraumatic Stress Disorder, and Depression in U.S. Soldiers Involved in  
491 Combat Deployments. *Psychosomatic Medicine* 74: 249–257, 2012.
- 492

Expansion of a fly TBI model and synergistic effects

493 **Table 1:** Full reporting of categorical count data for all TBI conditions.

| <b>Genotype</b>                   | <b>Angle of Deflection</b> | <b>HITs</b>   | <b>Alive @ 24 h</b> | <b>Dead @ 24 h</b> | <b>MI<sub>24</sub></b> |
|-----------------------------------|----------------------------|---------------|---------------------|--------------------|------------------------|
| <i>w<sup>1118</sup></i>           | 0 – uninjured              | 0 – uninjured | 1325                | 0                  | 0.0                    |
| <i>y<sup>1</sup>w<sup>1</sup></i> | 0 – uninjured              | 0 – uninjured | 1256                | 3                  | 0.2                    |
| <i>w<sup>1118</sup></i>           | 60°                        | 1             | 837                 | 1                  | 0.1                    |
|                                   |                            | 2             | 1453                | 9                  | 0.6                    |
|                                   |                            | 3             | 1104                | 9                  | 0.8                    |
|                                   |                            | 4             | 864                 | 33                 | 3.7                    |
| <i>y<sup>1</sup>w<sup>1</sup></i> | 60°                        | 1             | 806                 | 8                  | 1.0                    |
|                                   |                            | 2             | 959                 | 16                 | 1.6                    |
|                                   |                            | 3             | 807                 | 29                 | 3.5                    |
|                                   |                            | 4             | 748                 | 124                | 14.2                   |
| <i>w<sup>1118</sup></i>           | 70°                        | 1             | 1108                | 15                 | 1.3                    |
|                                   |                            | 2             | 1391                | 55                 | 3.8                    |
|                                   |                            | 3             | 984                 | 71                 | 6.7                    |
|                                   |                            | 4             | 797                 | 138                | 14.8                   |
| <i>y<sup>1</sup>w<sup>1</sup></i> | 70°                        | 1             | 887                 | 18                 | 2.0                    |
|                                   |                            | 2             | 962                 | 47                 | 4.7                    |
|                                   |                            | 3             | 773                 | 164                | 17.5                   |
|                                   |                            | 4             | 524                 | 236                | 31.1                   |
| <i>w<sup>1118</sup></i>           | 80°                        | 1             | 689                 | 19                 | 2.7                    |
|                                   |                            | 2             | 1313                | 128                | 8.9                    |
|                                   |                            | 3             | 887                 | 201                | 18.5                   |
|                                   |                            | 4             | 570                 | 277                | 32.7                   |
| <i>y<sup>1</sup>w<sup>1</sup></i> | 80°                        | 1             | 733                 | 64                 | 8.0                    |
|                                   |                            | 2             | 718                 | 156                | 17.8                   |
|                                   |                            | 3             | 561                 | 265                | 32.1                   |
|                                   |                            | 4             | 334                 | 343                | 50.7                   |
| <i>w<sup>1118</sup></i>           | 90°                        | 1             | 568                 | 66                 | 10.4                   |
|                                   |                            | 2             | 985                 | 386                | 28.2                   |
|                                   |                            | 3             | 602                 | 512                | 46.0                   |
|                                   |                            | 4             | 342                 | 390                | 53.3                   |
| <i>y<sup>1</sup>w<sup>1</sup></i> | 90°                        | 1             | 735                 | 137                | 15.7                   |
|                                   |                            | 2             | 607                 | 312                | 33.9                   |
|                                   |                            | 3             | 283                 | 459                | 61.9                   |
|                                   |                            | 4             | 105                 | 467                | 81.6                   |

Expansion of a fly TBI model and synergistic effects

494 **Table 2:** Full reporting of line-fit slopes for MI<sub>24</sub>/HIT data and resulting p-values.

| <u>Genotype</u>                   | <u>Angle of Deflection</u> | <u>Slope +/- SE</u> | <u>95% CI of slope</u> | <u>Significantly non-zero slope?</u> | <u>p-value</u> |
|-----------------------------------|----------------------------|---------------------|------------------------|--------------------------------------|----------------|
| <i>w<sup>1118</sup></i>           | 60                         | 0.24 +/- 0.1        | -0.18 to 0.66          | no                                   | 0.136          |
| <i>y<sup>1</sup>w<sup>1</sup></i> | 60                         | 0.81 +/- 0.42       | -1.00 to 2.61          | no                                   | 0.195          |
| <i>w<sup>1118</sup></i>           | 70                         | 0.74 +/- 0.17       | 0.02 to 1.46           | <b>yes</b>                           | <b>0.048</b>   |
| <i>y<sup>1</sup>w<sup>1</sup></i> | 70                         | 2.08 +/- 0.42       | 0.28 to 3.89           | <b>yes</b>                           | <b>0.038</b>   |
| <i>w<sup>1118</sup></i>           | 80                         | 1.82 +/- 0.05       | 1.61 to 2.03           | <b>yes</b>                           | <b>0.001</b>   |
| <i>y<sup>1</sup>w<sup>1</sup></i> | 80                         | 1.57 +/- 0.18       | 0.81 to 2.33           | <b>yes</b>                           | <b>0.013</b>   |
| <i>w<sup>1118</sup></i>           | 90                         | 1.00 +/- 0.90       | -2.87 to 4.86          | no                                   | 0.382          |
| <i>y<sup>1</sup>w<sup>1</sup></i> | 90                         | 1.77 +/- 0.50       | -0.37 to 3.92          | no                                   | 0.071          |

495

## Expansion of a fly TBI model and synergistic effects

496 **Figure 1**

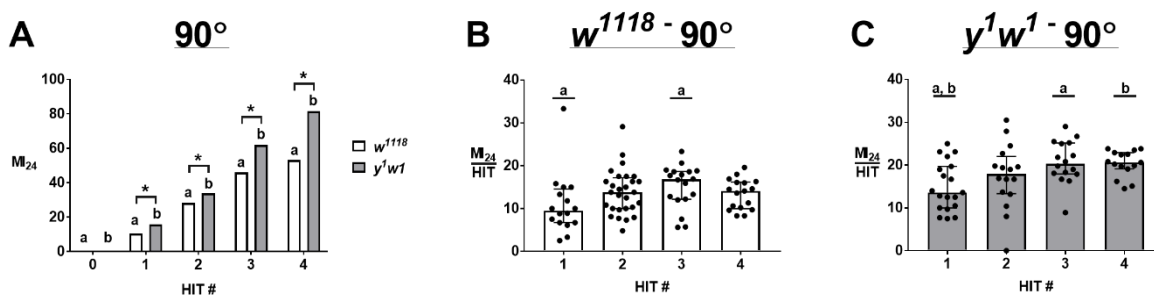

497

## Expansion of a fly TBI model and synergistic effects

498 **Figure 2**

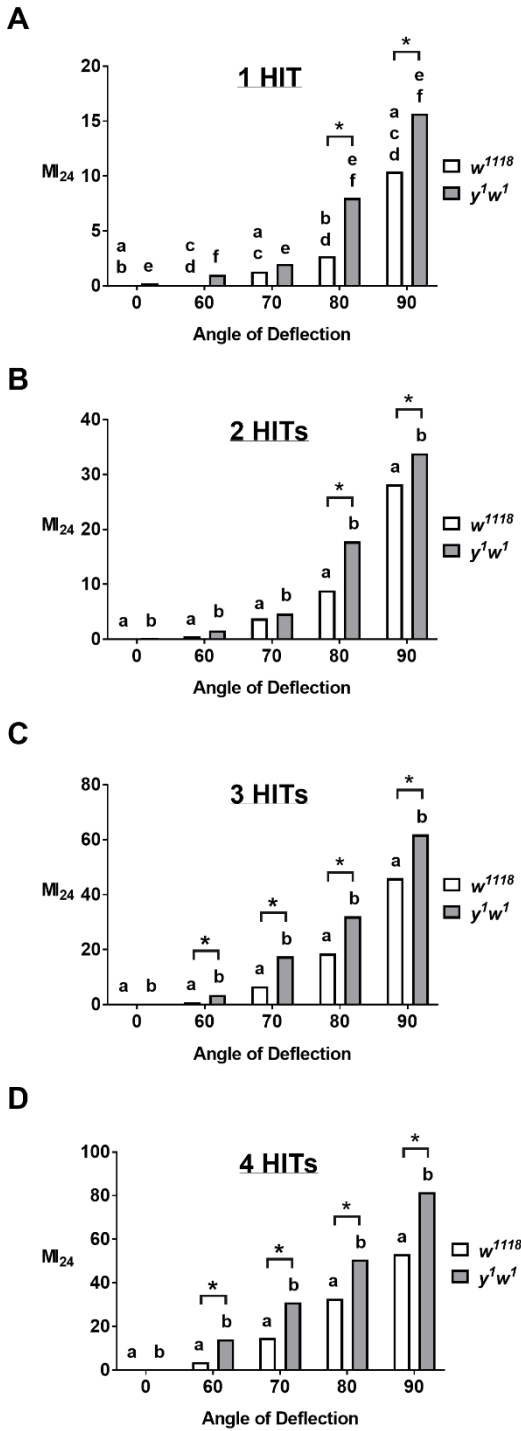

499

Expansion of a fly TBI model and synergistic effects

500 **Figure 3**

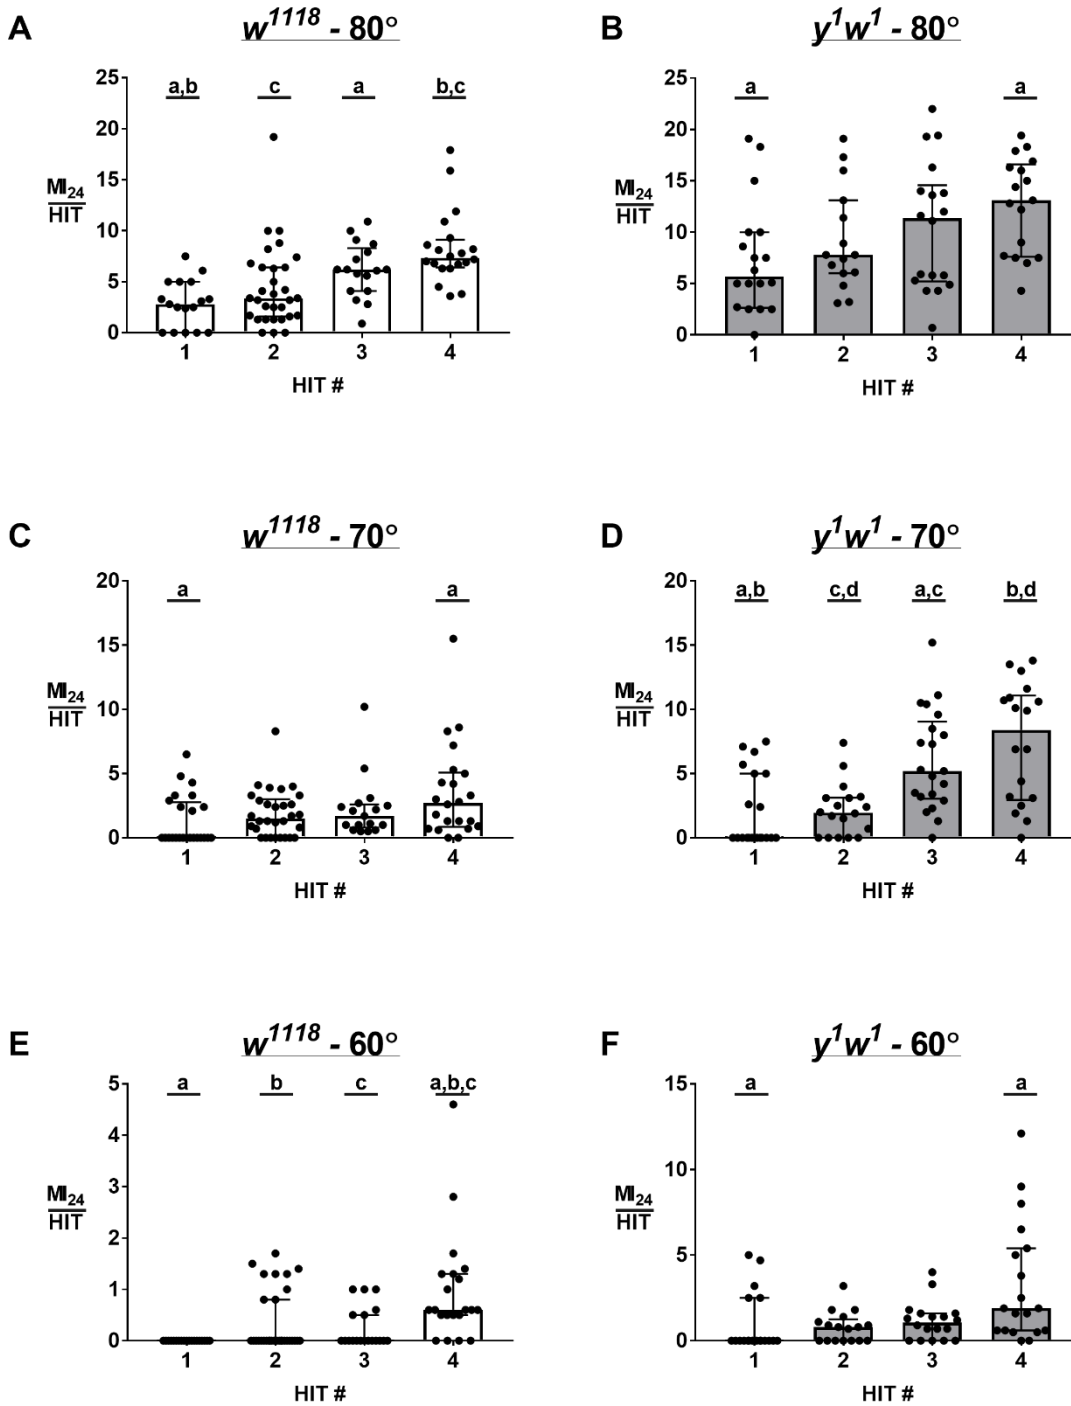

501

## Expansion of a fly TBI model and synergistic effects

502 **Figure 4**

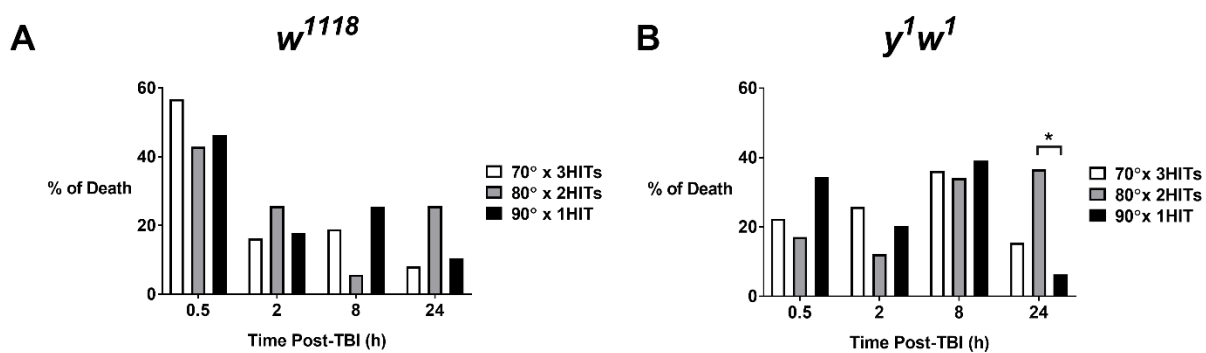

503



Expansion of a fly TBI model and synergistic effects

504 **Figure 5**

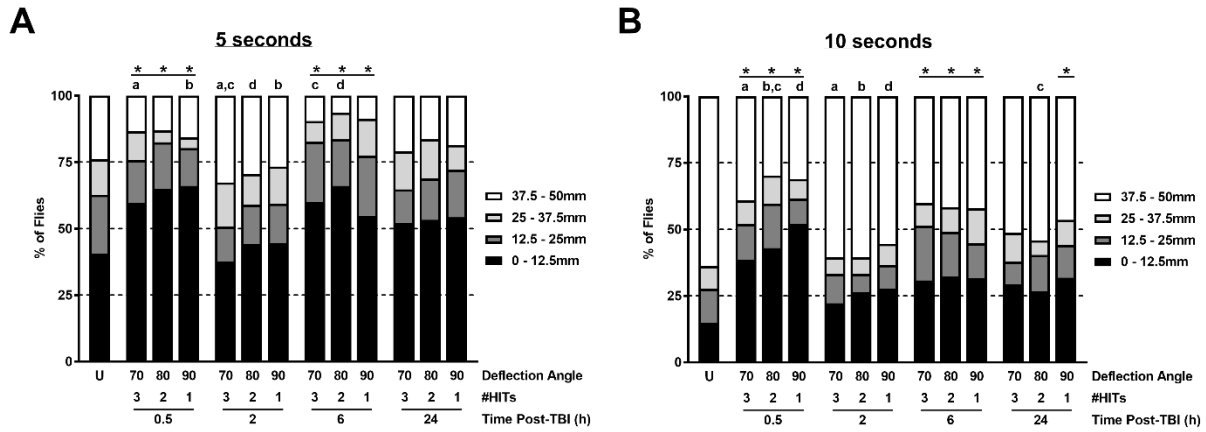

505

## Expansion of a fly TBI model and synergistic effects

506 **Figure 1:** Increasing HIT number at 90° deflection increases  $MI_{24}$  and reveals differences in  $MI_{24}$   
507 per hit. (A)  $MI_{24}$  values increase with HIT number in both  $w^{1118}$  and  $y^1w^1$ , with  $y^1w^1$  suffering  
508 greater  $MI_{24}$  across all HIT numbers. Zero HITs represents uninjured controls. Conditions that  
509 share a letter are statistically different ( $p \leq 0.0023$ ,  $\alpha = 0.005$ ), while (\*) indicates differences  
510 between genotypes ( $p \leq 0.0029$ ,  $\alpha = 0.01$ ) by Fisher's Exact Test with Bonferroni correction.  $n \geq$   
511 572 flies for each condition. (B, C)  $MI_{24}$  values were divided by HIT number for  $w^{1118}$  (B) and  
512  $y^1w^1$  (C). Data plotted are medians with interquartile ranges, with individual data points for each  
513 vial of at least 30 flies. Conditions that share a letter are statistically different ( $p < 0.05$ ,  $\alpha = 0.05$   
514 by Kruskal-Wallis with Dunn's correction,  $n \geq 15$  vials for each condition).

515  
516 **Figure 2:** Mortality is reduced at smaller angles of deflection. Flies were administered 1-4HITs  
517 (A-D as indicated) at designated angles of deflection from 60° to 90°. Zero degrees represents  
518 uninjured controls. Conditions that share a letter are statistically different ( $p \leq 0.0042$ ,  $\alpha =$   
519 0.005), while (\*) indicates differences between genotypes ( $p \leq 0.0035$ ,  $\alpha = 0.01$ ) by Fisher's  
520 Exact Test with Bonferroni correction.  $n \geq 572$  flies for each condition.

521  
522 **Figure 3:** Differences in  $MI_{24}$  per hit are readily apparent for sub-90° injury conditions.  $MI_{24}$   
523 values were divided by HIT number for  $w^{1118}$  and  $y^1w^1$  as indicated at angles of deflection of 80°  
524 (A, B), 70° (C, D) and 60° (E, F). Data plotted are medians with interquartile ranges, with  
525 individual data points for each vial of at least 30 flies. Conditions that share a letter are  
526 statistically different ( $p < 0.05$ ,  $\alpha = 0.05$  by Kruskal-Wallis with Dunn's correction).  $n \geq 15$  vials  
527 for each condition.

528  
529 **Figure 4:** The time-course of mortality differs for 80° x 2HITs vs 90° x 1HIT.  $w^{1118}$  (A) and  $y^1w^1$   
530 (B) flies were injured by one of three designated conditions and the percentage of total death by  
531 24 h post-injury is plotted for each of 4 time-points. Datasets of 80° x 2HITs vs 90° x 1HIT  
532 differed for each genotype ( $p = 0.026$  for  $w^{1118}$ ,  $p = 0.001$  for  $y^1w^1$ ,  $\alpha = 0.05$  by 4x2 Fisher's  
533 Exact Test), while (\*) indicates a difference via post-hoc pairwise comparison ( $p < 0.001$ ,  $\alpha =$   
534 0.0125 by Fisher's Exact Test with Bonferroni correction).  $n \geq 276$  flies per condition.

535  
536 **Figure 5:**  $w^{1118}$  flies subjected to TBI exhibit time-dependent geotaxis impairment. Distances  
537 traveled by flies at 5 seconds (A) and 10 seconds (B) after startle were binned into 12.5mm  
538 quartiles for uninjured flies (U) and each TBI condition and assessed time post-TBI (h)  
539 indicated. Conditions that share a letter are statistically different, while (\*) indicates a statistical  
540 difference between uninjured flies and the indicated condition ( $p \leq 0.029$ ,  $\alpha = 0.05$  by Kruskal-  
541 Wallis with Dunn's correction).  $n \geq 101$  flies per condition.
